# Supplementary material for: Exploration of multiple Sortase A protein conformations in virtual screening
Source: PubMed Central journal article supplement (PMC4742773; doi:10.1038/srep20413), 2016-02-05
Supplement: srep20413-s1.pdf [file srep20413-s1.pdf]

# **Exploration of multiple Sortase A protein conformations in virtual screening**

*Chunxia Gao, Ivana Uzelac, Johan Gottfries, Leif A Eriksson\**

Department of Chemistry and Molecular Biology, University of Gothenburg,

405 30 Göteborg, Sweden

## **SUPPLEMENTARY DATA:**

**Figures S1-S3**

**Tables S1-S7**

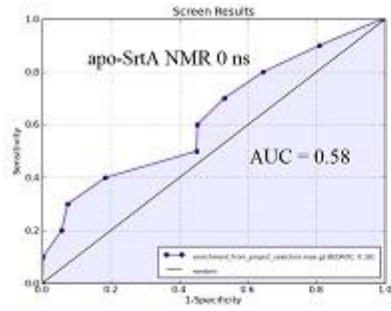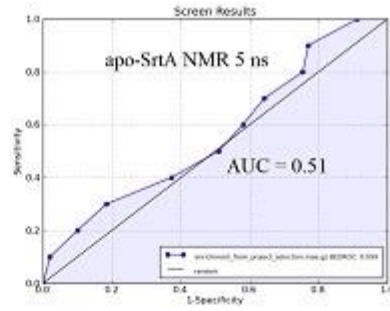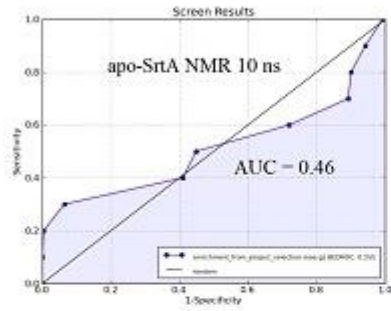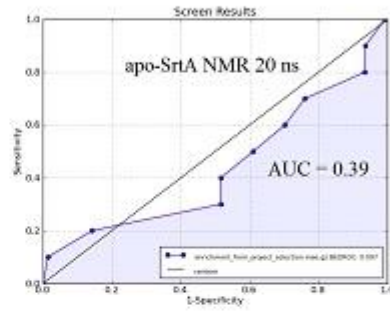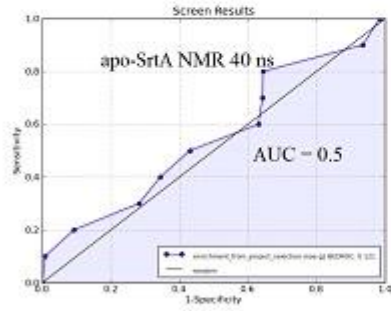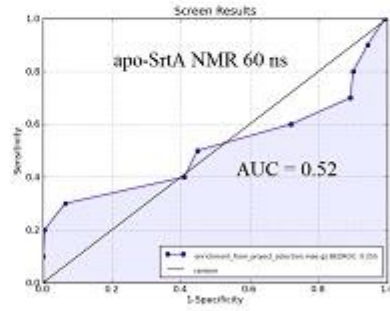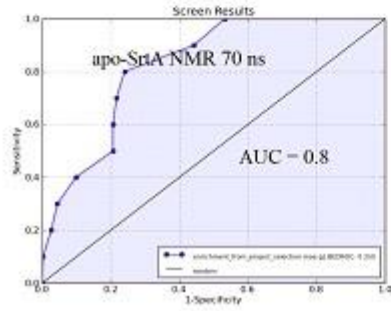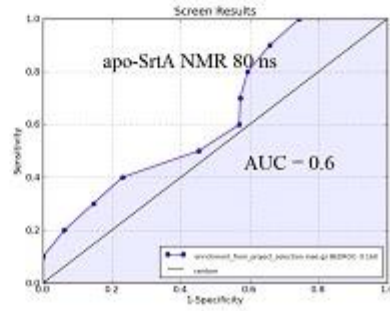

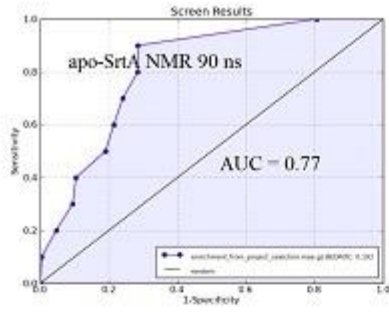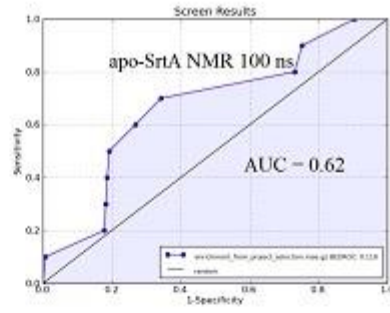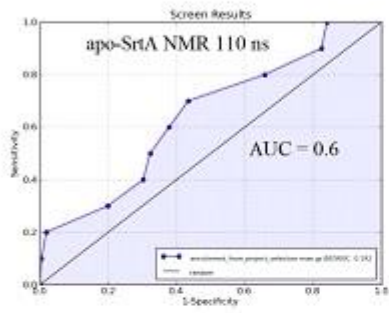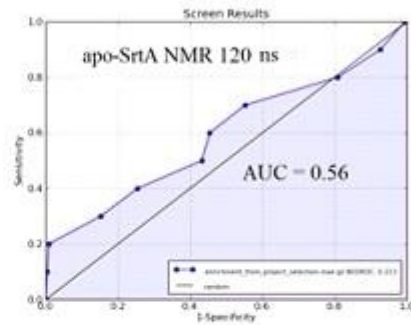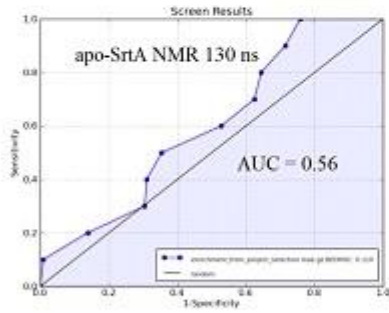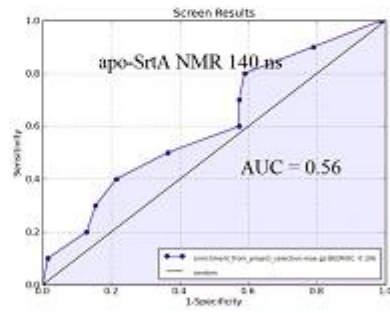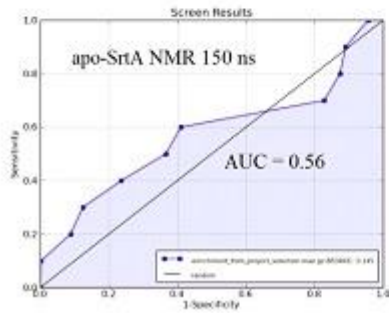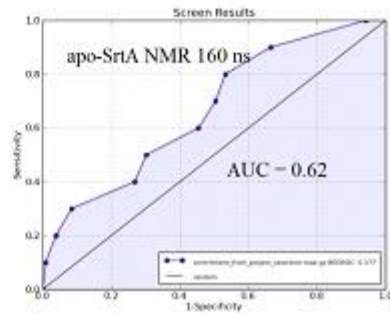

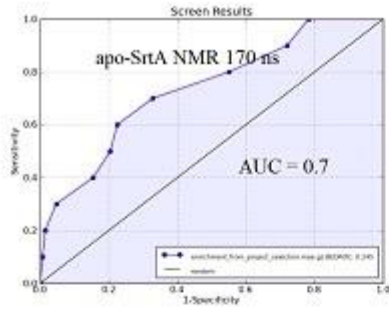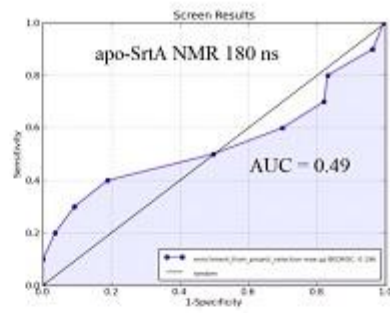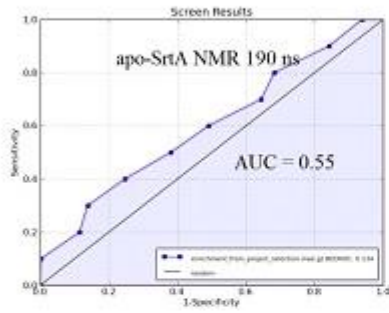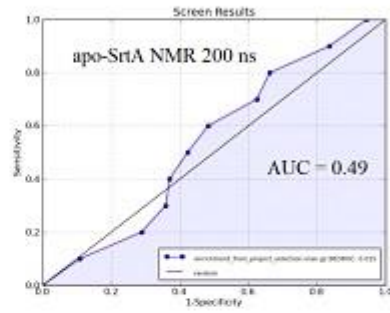

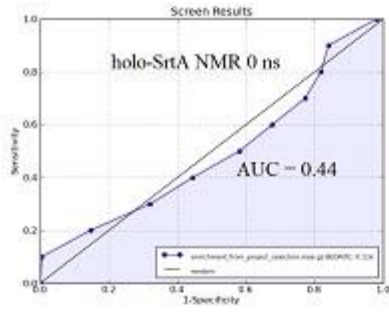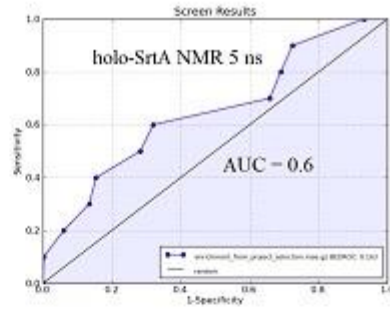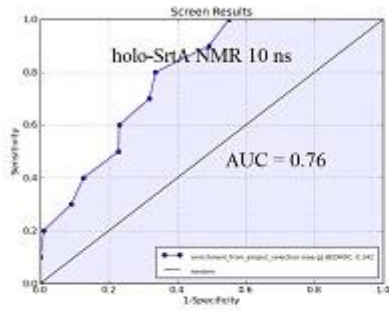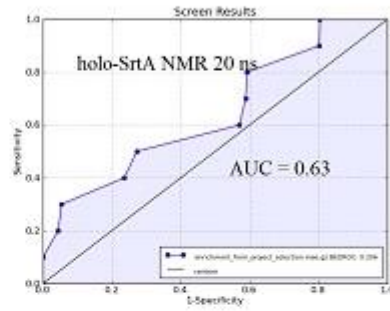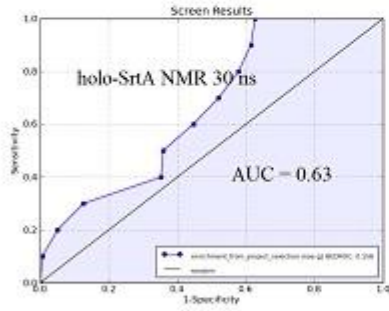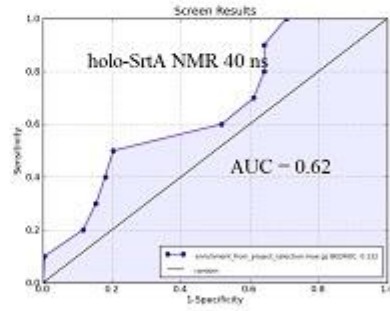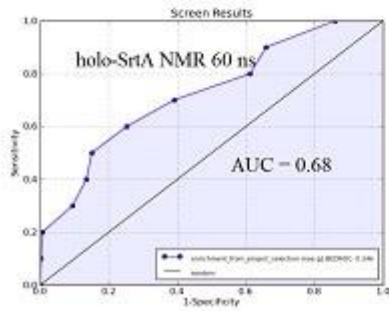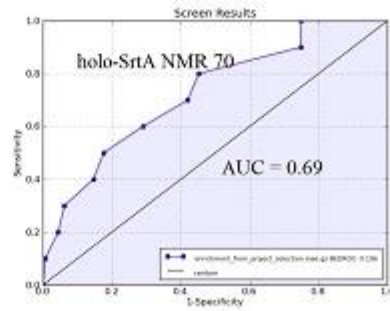

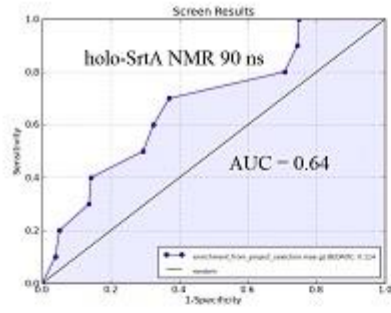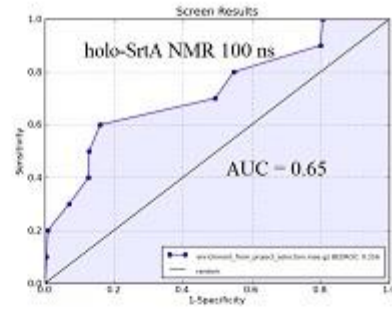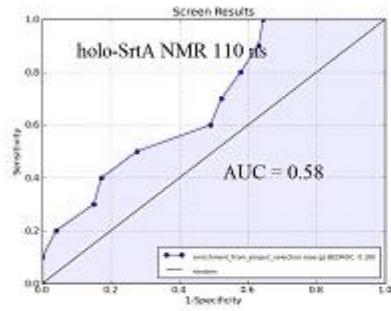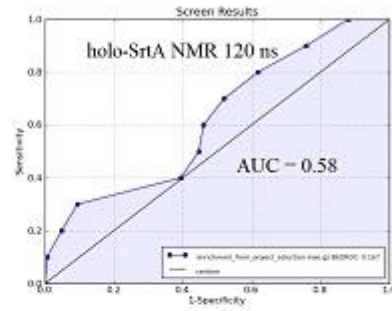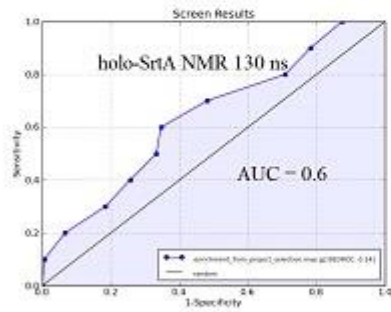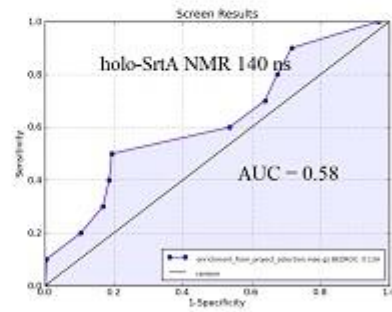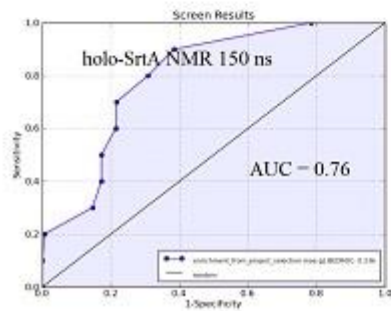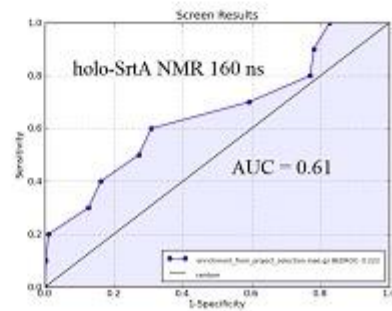

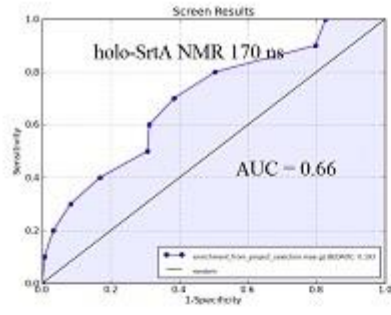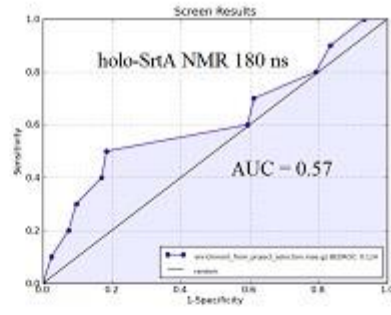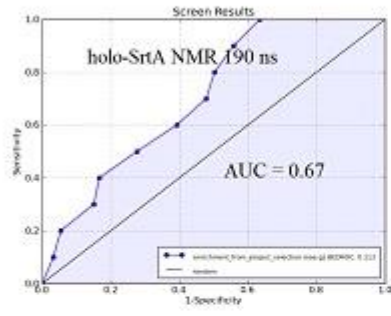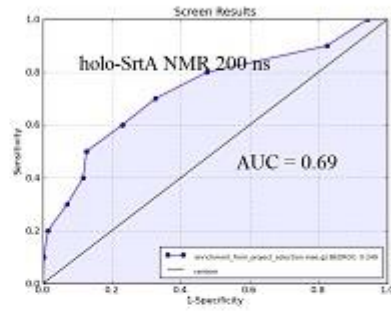

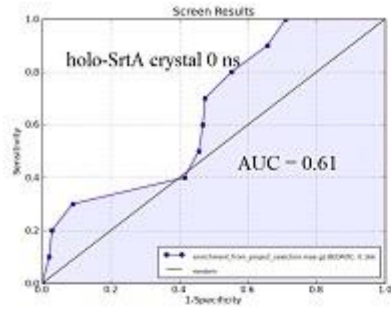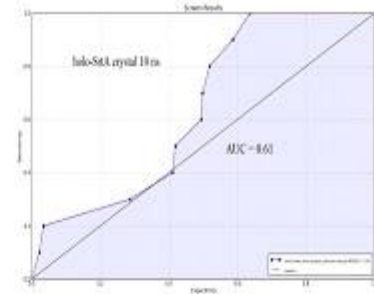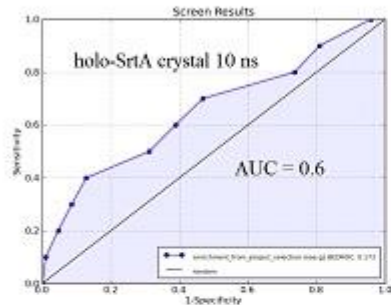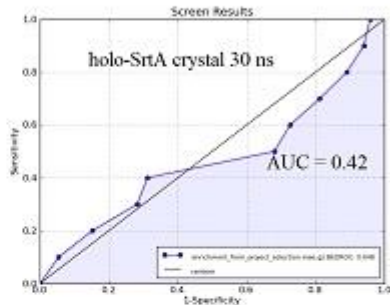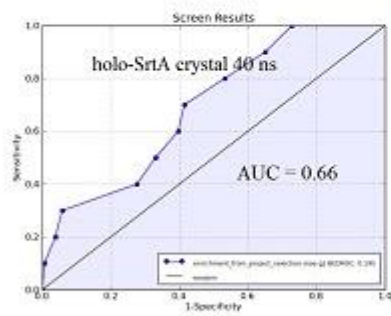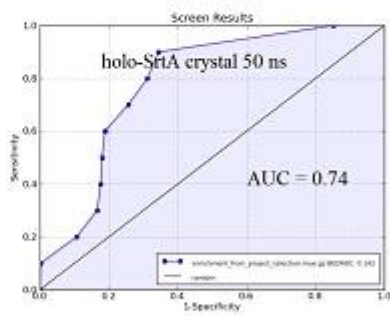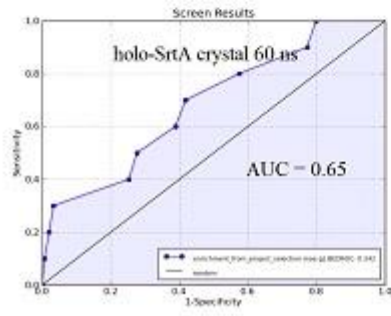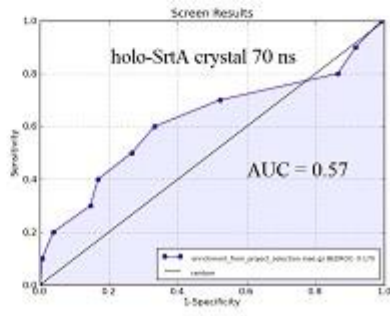



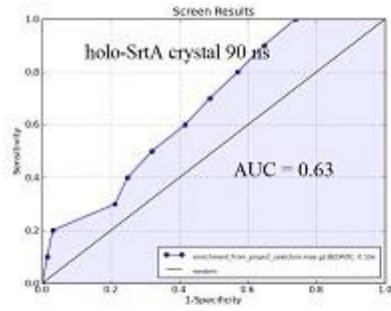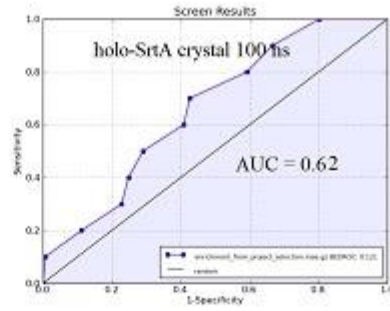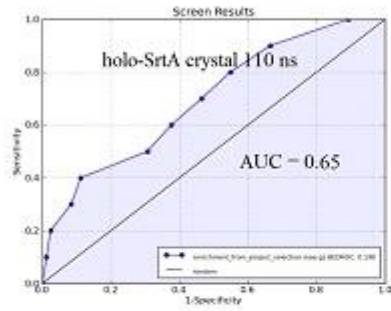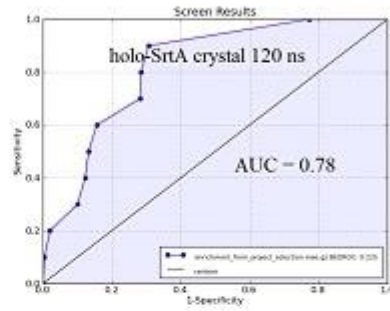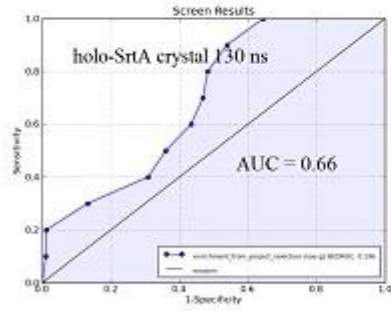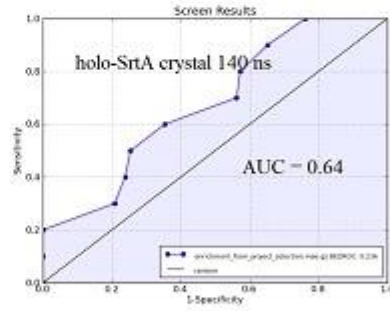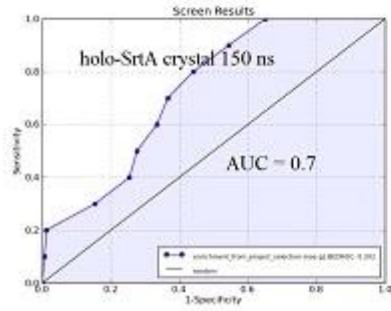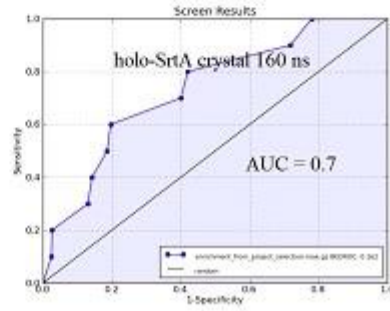

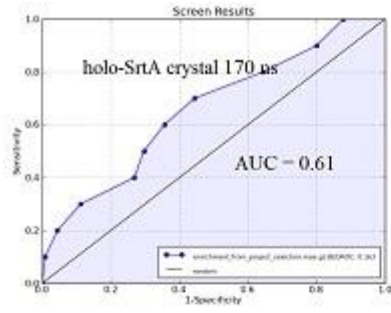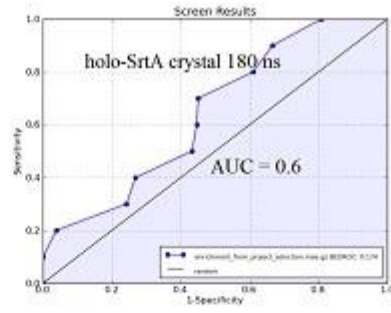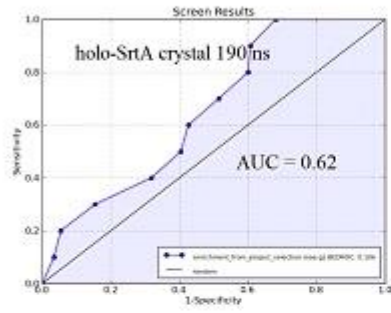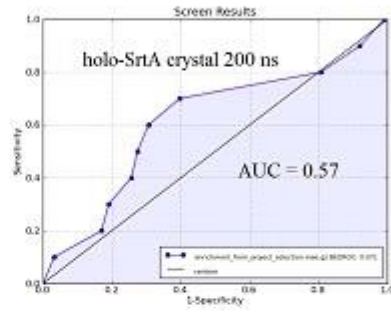

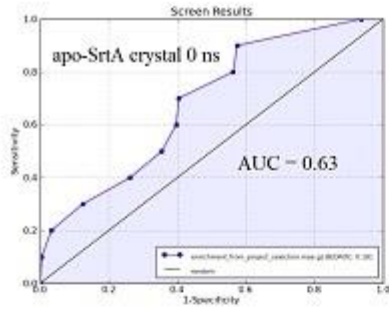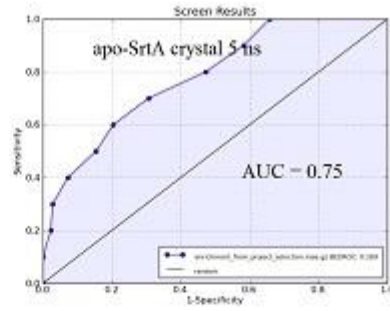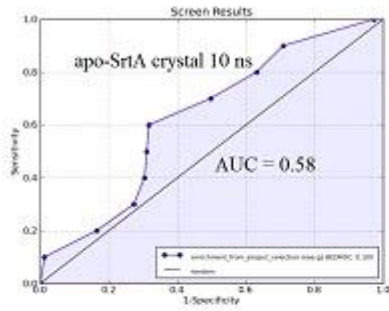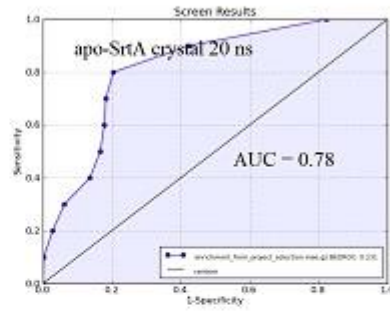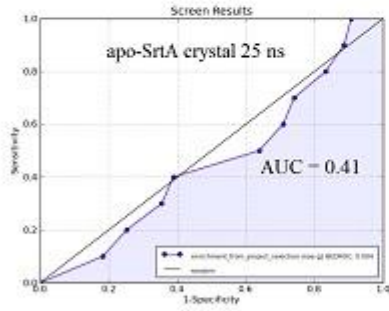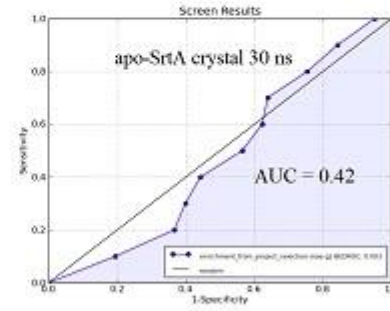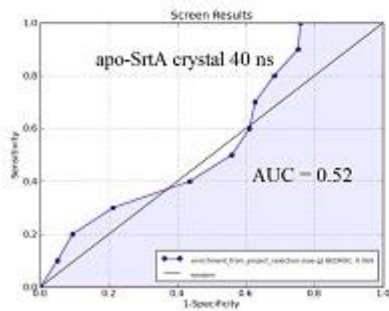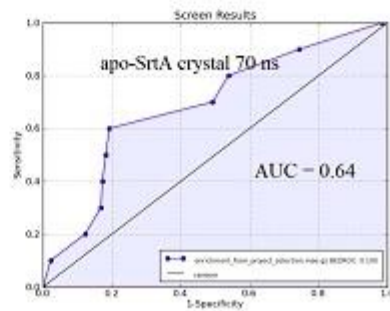

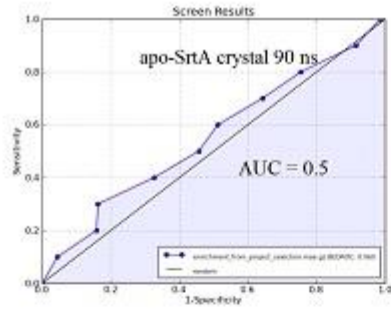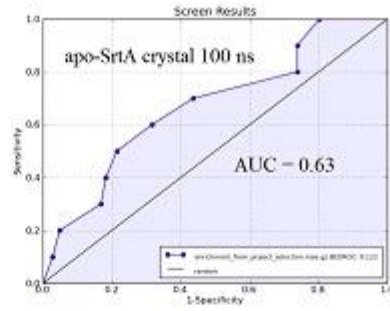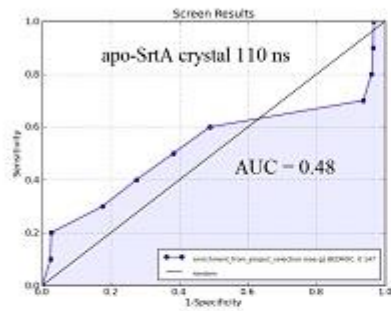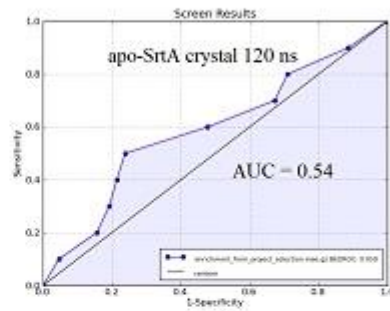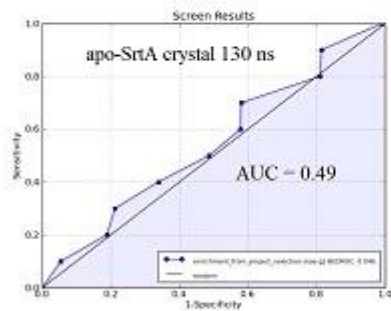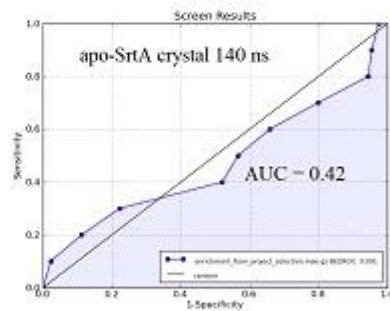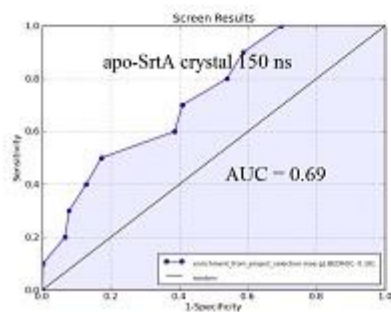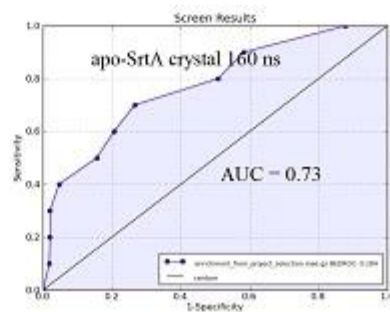

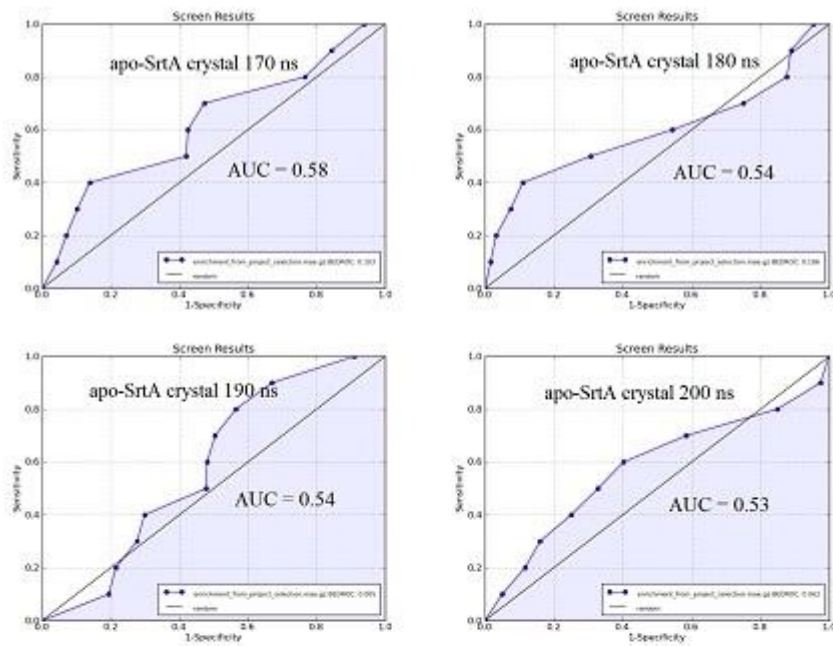

**Figure S1.** ROC plots for all the snapshots, for apo-SrtA NMR, holo-SrtA NMR, holo-SrtA Crystal structure, and apo-SrtA Crystal structure, respectively..



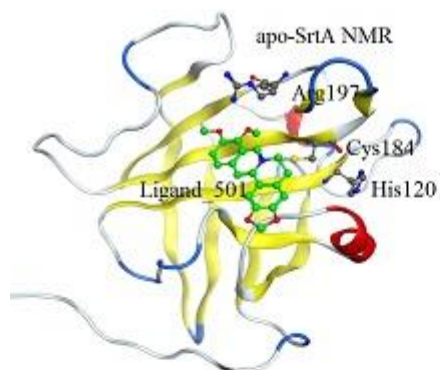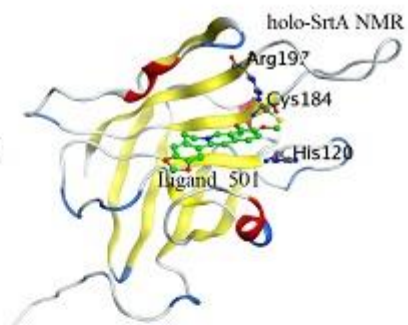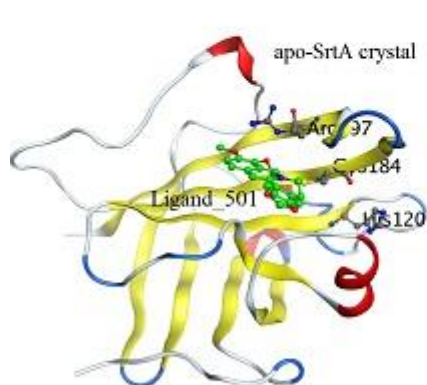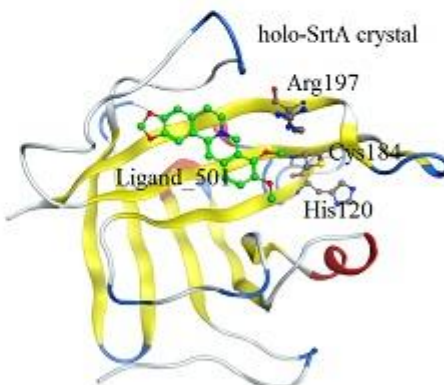

(Ligand\_501)

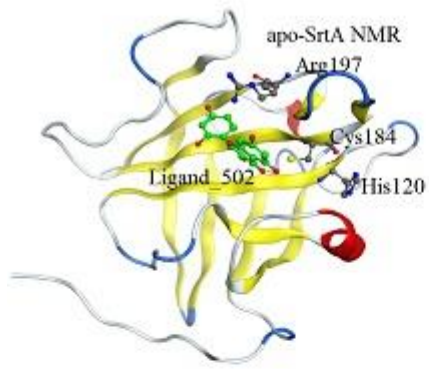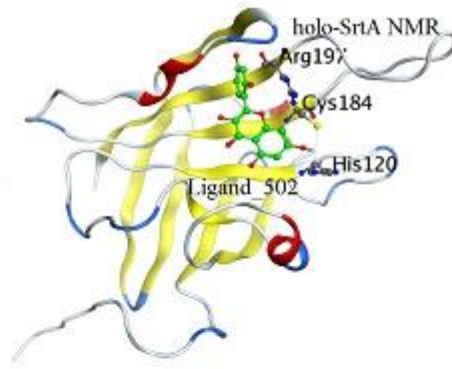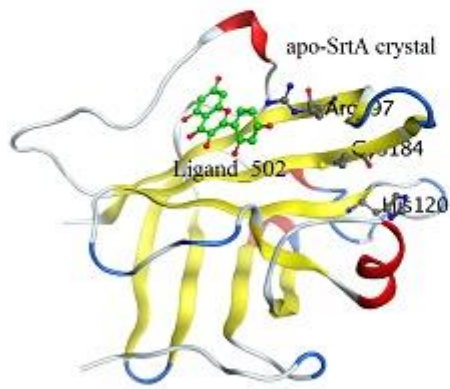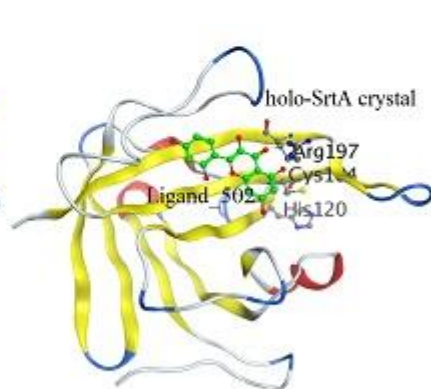

(Ligand\_502)



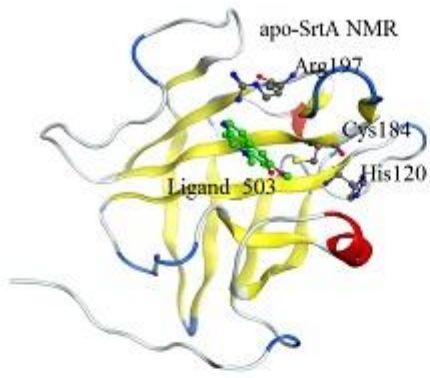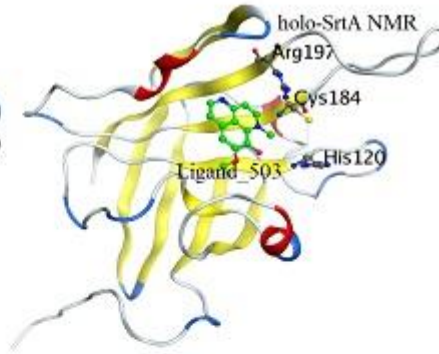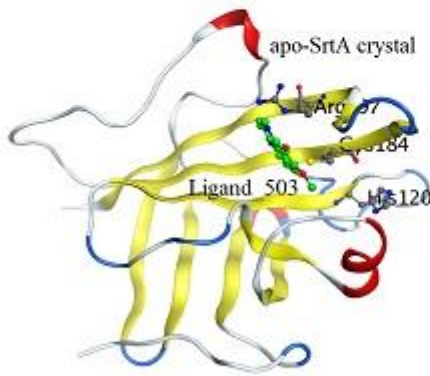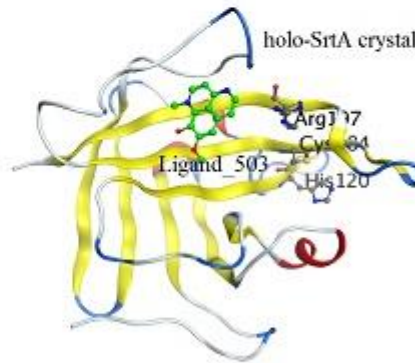

(Ligand\_503)

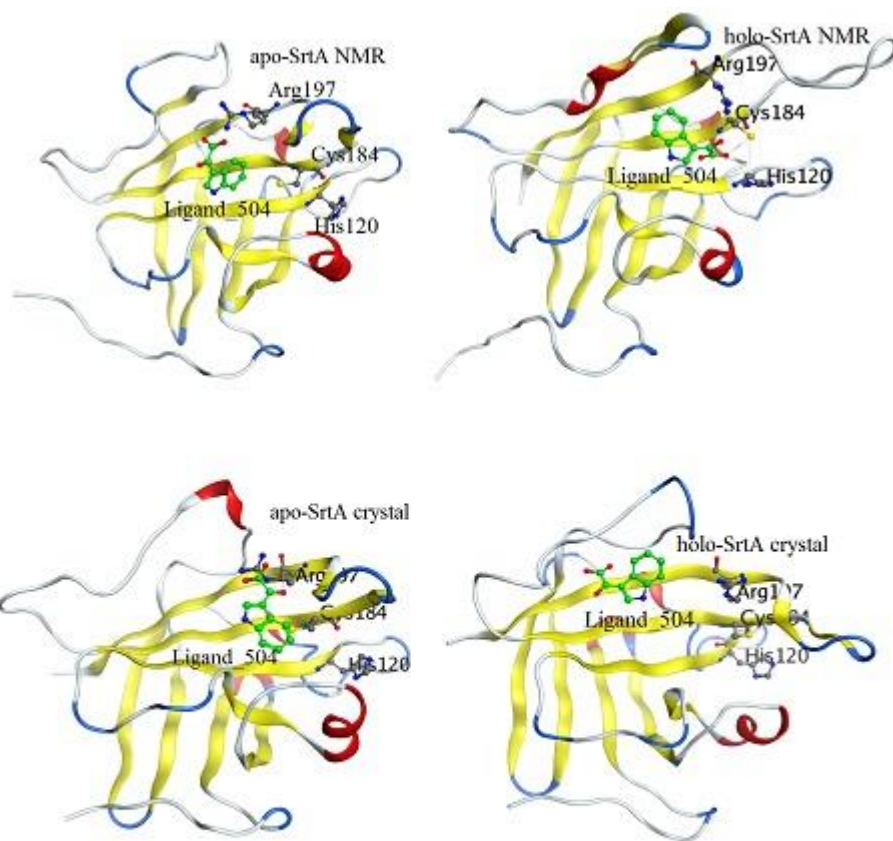

(Ligand\_504)

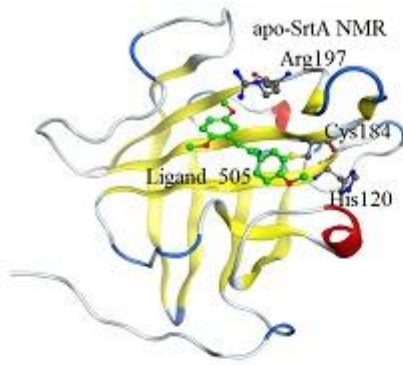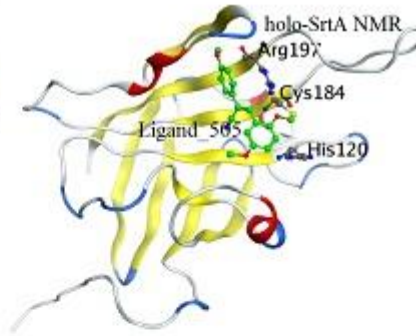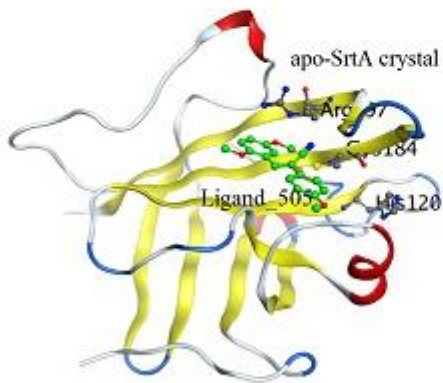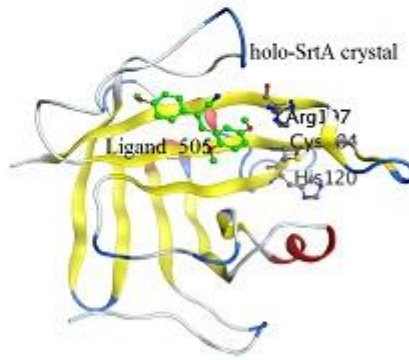

(Ligand\_505)

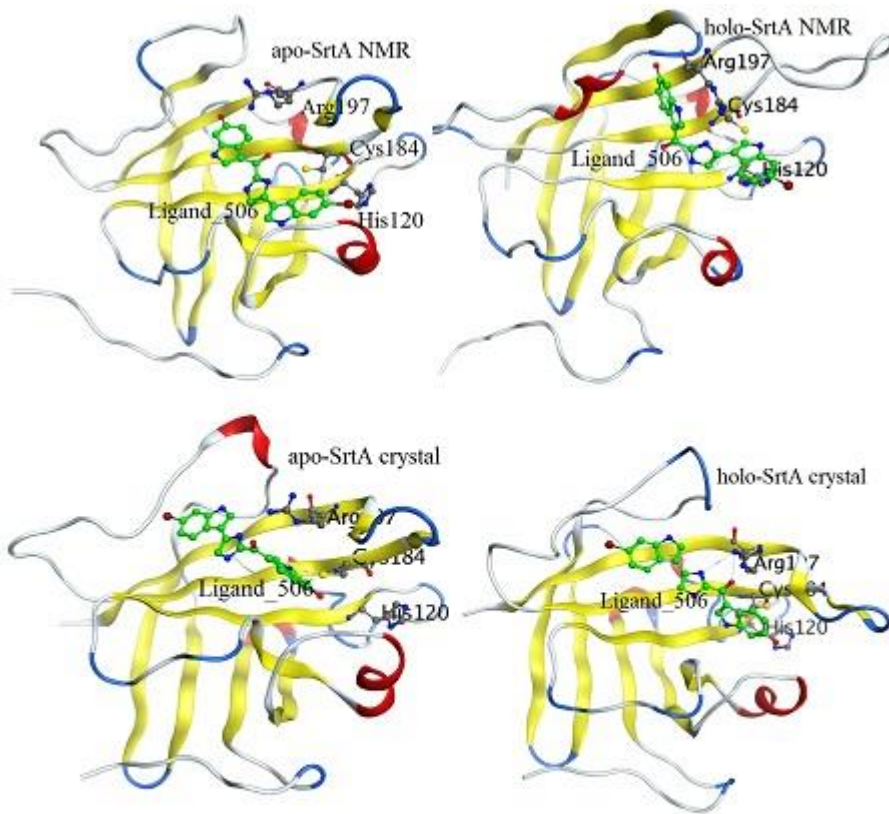

(Ligand\_506)

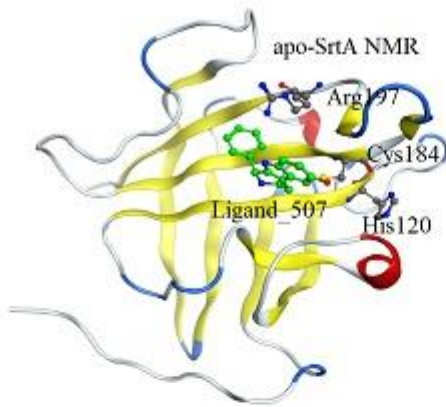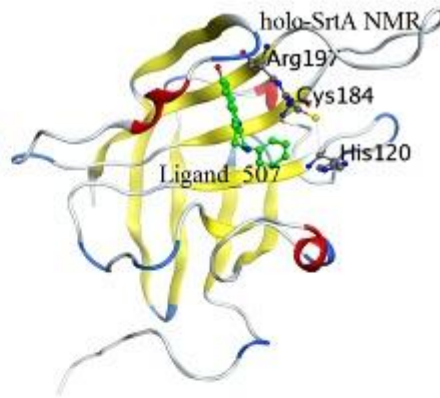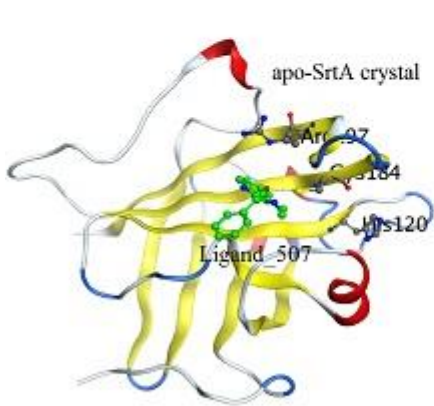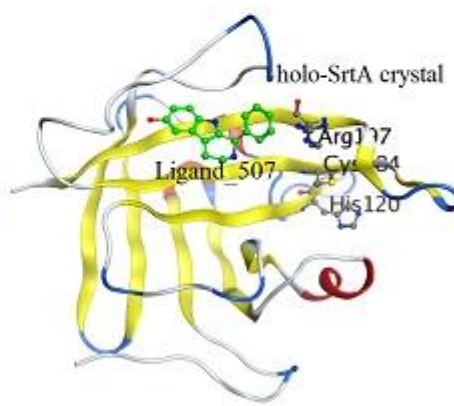

(Ligand\_507)

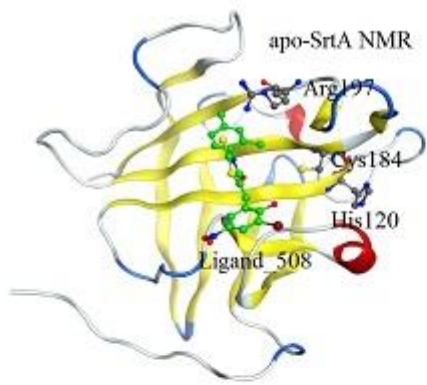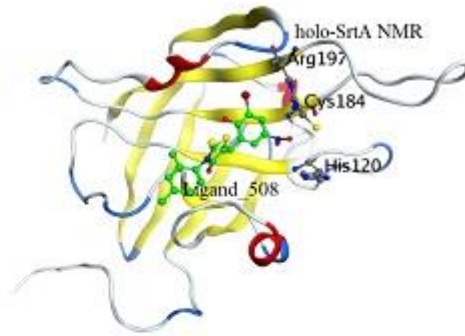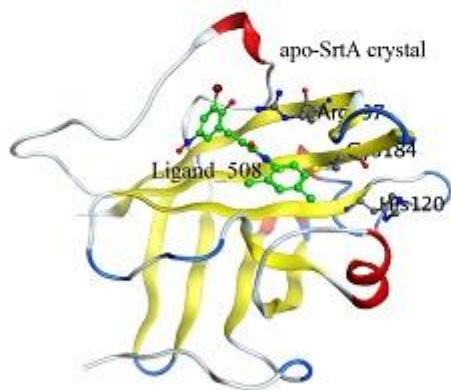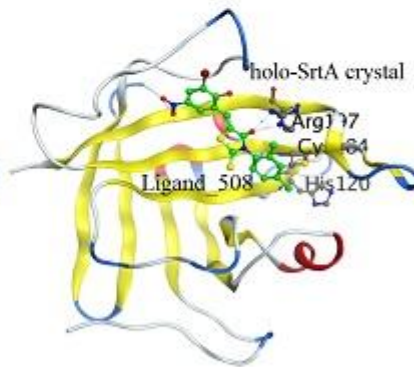

(Ligand\_508)

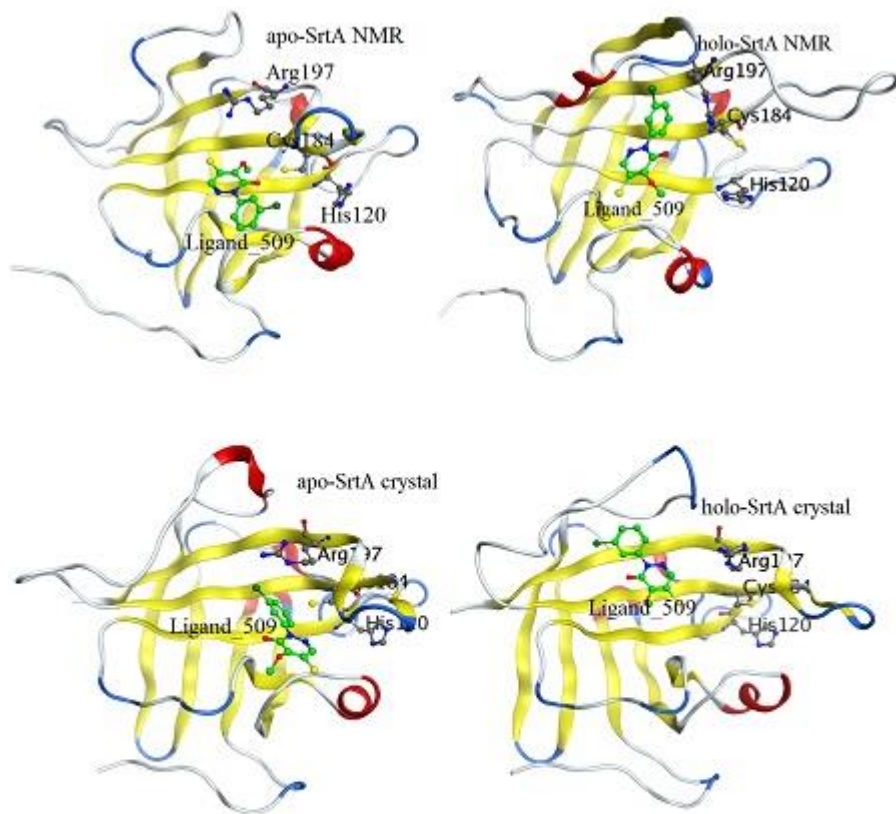

(Ligand\_509)

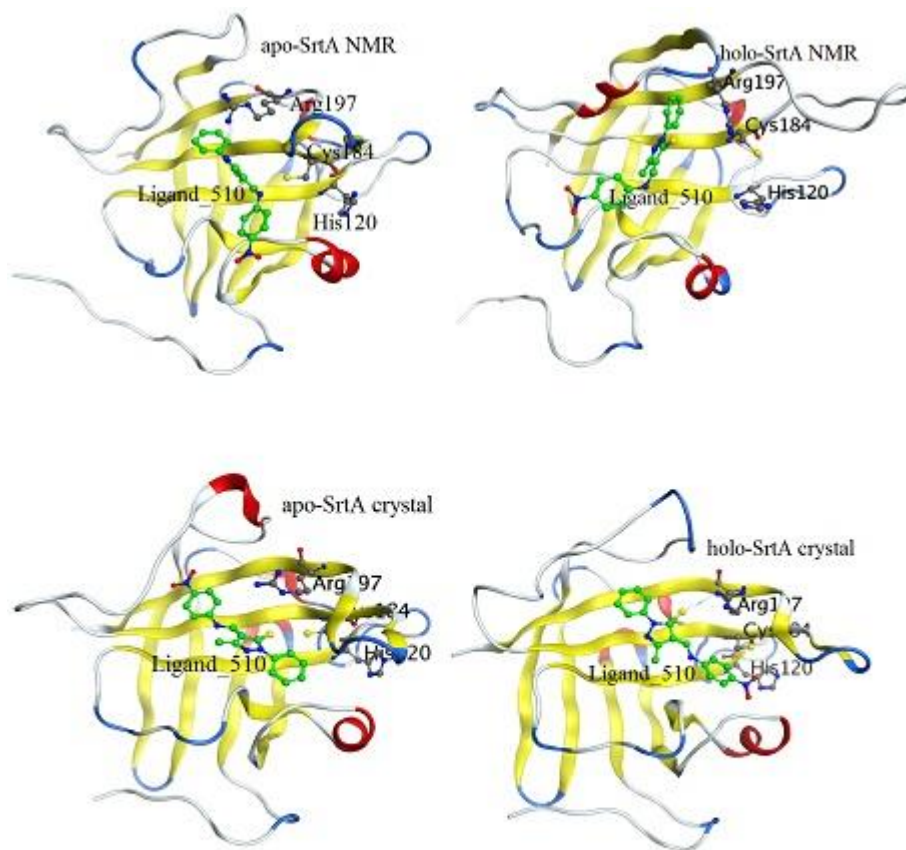

(Ligand\_510)

**Figure S2.** Docking poses for ligands 501 – 510, for all four receptor structures in the initial snapshot.



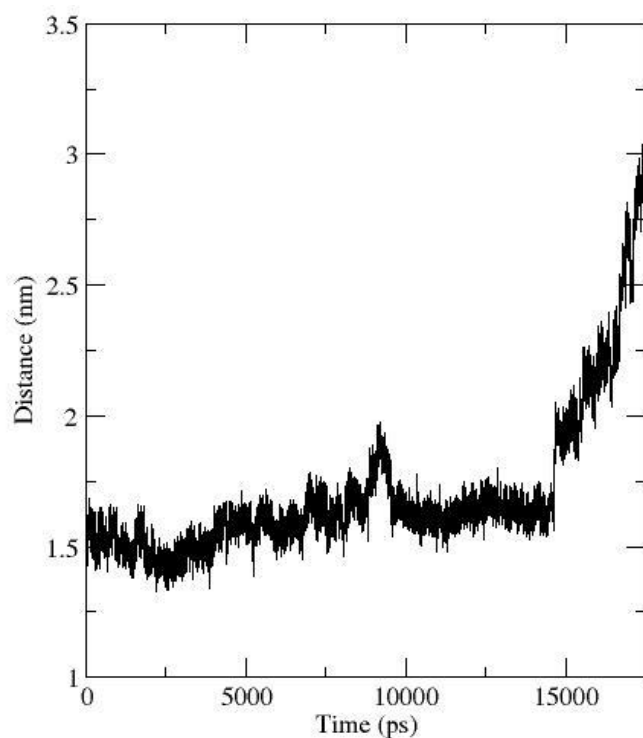

**Figure S3.** Distance between V166-V169 of the  $\beta 6/\beta 7$  loop and C184, monitored in the SMD pulling process.

**Table S1.** Data for Figure 5.

|                             | rmsd | distance | EF <sup>1%</sup> | AUC  | RIE  | BEDROC( $\alpha=160.9$ ) | BEDROC( $\alpha=20$ ) |
|-----------------------------|------|----------|------------------|------|------|--------------------------|-----------------------|
| apo-SrtA NMR structure      | 4,26 | 13,28    | 8,5              | 0,57 | 2,68 | 0,155                    | 0,162                 |
| Holo-SrtA NMR structure     | 3,61 | 14,71    | 9                | 0,64 | 2,97 | 0,172                    | 0,179                 |
| apo-SrtA crystal structure  | 4,63 | 20,38    | 2                | 0,57 | 1,92 | 0,049                    | 0,116                 |
| Holo-SrtA crystal structure | 2,87 | 17,39    | 5,5              | 0,63 | 2,68 | 0,1                      | 0,162                 |

**Table S2.** Ligand ranking for apo-SrtA NMR structure

| MD snapshot (ns) | 0    |            | 5    |            | 10   |            | 20   |            | 40   |            |
|------------------|------|------------|------|------------|------|------------|------|------------|------|------------|
|                  | Rank | Ligand     | Rank | Ligand     | Rank | ligand     | Rank | Ligand     | Rank | Ligand     |
|                  | 2    | ligand_502 | 11   | ligand_502 | 1    | ligand_502 | 8    | ligand_502 | 5    | ligand_502 |
|                  | 30   | ligand_506 | 52   | ligand_503 | 4    | ligand_504 | 73   | ligand_504 | 48   | ligand_509 |
|                  | 40   | ligand_504 | 95   | ligand_504 | 35   | ligand_503 | 261  | ligand_503 | 144  | ligand_508 |
|                  | 96   | ligand_509 | 190  | ligand_501 | 209  | ligand_507 | 262  | ligand_507 | 176  | ligand_504 |
|                  | 230  | ligand_503 | 260  | ligand_508 | 229  | ligand_509 | 310  | ligand_509 | 220  | ligand_506 |
|                  | 232  | ligand_507 | 296  | ligand_509 | 366  | ligand_506 | 357  | ligand_506 | 321  | ligand_503 |
|                  | 272  | ligand_505 | 328  | ligand_505 | 453  | ligand_508 | 387  | ligand_508 | 328  | ligand_505 |
|                  | 330  | ligand_510 | 385  | ligand_510 | 458  | ligand_510 | 475  | ligand_510 | 330  | ligand_507 |
|                  | 413  | ligand_508 | 394  | ligand_506 | 480  | ligand_505 | 477  | ligand_505 | 476  | ligand_510 |
|                  | 505  | ligand_501 | 466  | ligand_507 | 506  | ligand_501 | 506  | ligand_501 | 502  | ligand_501 |
|                  |      |            |      |            |      |            |      |            |      |            |
|                  | 60   |            | 70   |            | 80   |            | 90   |            | 100  |            |
|                  | Rank | Ligand     | Rank | Ligand     | Rank | ligand     | Rank | Ligand     | Rank | Ligand     |
|                  | 2    | ligand_502 | 2    | ligand_502 | 1    | ligand_502 | 3    | ligand_502 | 4    | ligand_502 |
|                  | 8    | ligand_506 | 15   | ligand_504 | 33   | ligand_506 | 25   | ligand_503 | 91   | ligand_504 |
|                  | 40   | ligand_504 | 25   | ligand_509 | 76   | ligand_509 | 50   | ligand_508 | 94   | ligand_506 |
|                  | 110  | ligand_509 | 53   | ligand_506 | 119  | ligand_507 | 56   | ligand_504 | 97   | ligand_508 |
|                  | 207  | ligand_503 | 108  | ligand_503 | 231  | ligand_504 | 100  | ligand_509 | 101  | ligand_503 |
|                  | 295  | ligand_507 | 109  | ligand_508 | 291  | ligand_508 | 113  | ligand_505 | 140  | ligand_507 |
|                  | 432  | ligand_510 | 115  | ligand_505 | 293  | ligand_503 | 127  | ligand_501 | 178  | ligand_509 |
|                  | 436  | ligand_505 | 128  | ligand_507 | 305  | ligand_505 | 150  | ligand_507 | 373  | ligand_510 |
|                  | 439  | ligand_501 | 230  | ligand_510 | 338  | ligand_510 | 151  | ligand_506 | 385  | ligand_501 |
|                  | 472  | ligand_508 | 276  | ligand_501 | 382  | ligand_501 | 413  | ligand_510 | 462  | ligand_505 |
|                  |      |            |      |            |      |            |      |            |      |            |
|                  | 110  |            | 120  |            | 130  |            | 140  |            | 150  |            |
|                  | Rank | Ligand     | Rank | Ligand     | Rank | ligand     | Rank | Ligand     | Rank | Ligand     |
|                  | 1    | ligand_502 | 3    | ligand_506 | 5    | ligand_502 | 8    | ligand_502 | 2    | ligand_502 |
|                  | 3    | ligand_504 | 6    | ligand_502 | 71   | ligand_506 | 66   | ligand_509 | 46   | ligand_503 |
|                  | 11   | ligand_510 | 79   | ligand_504 | 155  | ligand_503 | 80   | ligand_504 | 65   | ligand_507 |
|                  | 102  | ligand_503 | 131  | ligand_505 | 159  | ligand_504 | 111  | ligand_506 | 122  | ligand_510 |
|                  | 155  | ligand_505 | 221  | ligand_508 | 182  | ligand_505 | 187  | ligand_501 | 188  | ligand_505 |
|                  | 166  | ligand_506 | 233  | ligand_509 | 270  | ligand_508 | 292  | ligand_503 | 211  | ligand_506 |
|                  | 195  | ligand_509 | 283  | ligand_503 | 319  | ligand_507 | 293  | ligand_505 | 421  | ligand_509 |
|                  | 224  | ligand_508 | 412  | ligand_507 | 330  | ligand_509 | 302  | ligand_507 | 445  | ligand_504 |
|                  | 337  | ligand_501 | 472  | ligand_510 | 366  | ligand_510 | 403  | ligand_508 | 454  | ligand_508 |
|                  | 421  | ligand_507 | 507  | ligand_501 | 389  | ligand_501 | 503  | ligand_510 | 488  | ligand_501 |

---

| 160  |            | 170  |            | 180  |            | 190  |            | 200  |            |
|------|------------|------|------------|------|------------|------|------------|------|------------|
| Rank | Ligand     | Rank | Ligand     | Rank | ligand     | Rank | Ligand     | Rank | Ligand     |
| 5    | ligand_502 | 4    | ligand_502 | 1    | ligand_502 | 2    | ligand_502 | 55   | ligand_509 |
| 21   | ligand_503 | 9    | ligand_504 | 20   | ligand_506 | 59   | ligand_509 | 146  | ligand_503 |
| 45   | ligand_504 | 26   | ligand_509 | 49   | ligand_509 | 72   | ligand_504 | 182  | ligand_510 |
| 138  | ligand_507 | 81   | ligand_503 | 98   | ligand_503 | 127  | ligand_506 | 189  | ligand_508 |
| 156  | ligand_506 | 107  | ligand_506 | 253  | ligand_504 | 195  | ligand_507 | 216  | ligand_502 |
| 233  | ligand_508 | 118  | ligand_505 | 355  | ligand_510 | 251  | ligand_510 | 247  | ligand_506 |
| 259  | ligand_510 | 171  | ligand_510 | 417  | ligand_507 | 329  | ligand_508 | 319  | ligand_507 |
| 274  | ligand_509 | 283  | ligand_501 | 423  | ligand_505 | 349  | ligand_503 | 339  | ligand_501 |
| 341  | ligand_505 | 369  | ligand_508 | 490  | ligand_501 | 430  | ligand_505 | 427  | ligand_505 |
| 481  | ligand_501 | 401  | ligand_507 | 507  | ligand_508 | 479  | ligand_501 | 482  | ligand_504 |

---

**Table S3.** Ligand ranking for holo-SrtA NMR structure

| MD snapshot (ns) | 0    |            | 5    |            | 10   |            | 20   |            | 30   |            |
|------------------|------|------------|------|------------|------|------------|------|------------|------|------------|
|                  | Rank | Ligand     | Rank | Ligand     | Rank | Ligand     | Rank | Ligand     | Rank | Ligand     |
|                  | 3    | ligand_502 | 2    | ligand_502 | 1    | ligand_502 | 1    | ligand_506 | 4    | ligand_502 |
|                  | 75   | ligand_507 | 32   | ligand_506 | 7    | ligand_506 | 24   | ligand_502 | 27   | ligand_506 |
|                  | 163  | ligand_506 | 70   | ligand_504 | 48   | ligand_509 | 30   | ligand_505 | 66   | ligand_504 |
|                  | 226  | ligand_505 | 81   | ligand_507 | 67   | ligand_507 | 122  | ligand_510 | 180  | ligand_503 |
|                  | 295  | ligand_509 | 146  | ligand_505 | 119  | ligand_505 | 141  | ligand_507 | 184  | ligand_505 |
|                  | 344  | ligand_504 | 166  | ligand_509 | 121  | ligand_503 | 291  | ligand_509 | 229  | ligand_510 |
|                  | 393  | ligand_503 | 336  | ligand_501 | 166  | ligand_508 | 301  | ligand_504 | 267  | ligand_501 |
|                  | 417  | ligand_510 | 353  | ligand_510 | 176  | ligand_510 | 304  | ligand_501 | 297  | ligand_508 |
|                  | 429  | ligand_501 | 371  | ligand_503 | 255  | ligand_501 | 410  | ligand_508 | 316  | ligand_507 |
|                  | 500  | ligand_508 | 476  | ligand_508 | 285  | ligand_504 | 412  | ligand_503 | 323  | ligand_509 |
|                  | 40   |            | 60   |            | 70   |            | 90   |            | 100  |            |
|                  | Rank | Ligand     | Rank | Ligand     | Rank | Ligand     | Rank | Ligand     | Rank | Ligand     |
|                  | 3    | ligand_502 | 2    | ligand_502 | 4    | ligand_502 | 14   | ligand_502 | 20   | ligand_506 |
|                  | 60   | ligand_504 | 5    | ligand_506 | 24   | ligand_506 | 35   | ligand_503 | 27   | ligand_502 |
|                  | 80   | ligand_506 | 50   | ligand_508 | 34   | ligand_509 | 133  | ligand_507 | 71   | ligand_501 |
|                  | 94   | ligand_509 | 71   | ligand_504 | 77   | ligand_504 | 174  | ligand_510 | 75   | ligand_503 |
|                  | 107  | ligand_507 | 80   | ligand_503 | 93   | ligand_507 | 186  | ligand_504 | 152  | ligand_508 |
|                  | 265  | ligand_503 | 132  | ligand_505 | 151  | ligand_503 | 205  | ligand_506 | 168  | ligand_504 |
|                  | 313  | ligand_505 | 202  | ligand_509 | 217  | ligand_508 | 324  | ligand_509 | 192  | ligand_509 |
|                  | 329  | ligand_510 | 314  | ligand_507 | 234  | ligand_510 | 363  | ligand_505 | 361  | ligand_505 |
|                  | 330  | ligand_501 | 338  | ligand_501 | 383  | ligand_501 | 483  | ligand_508 | 381  | ligand_507 |
|                  | 363  | ligand_508 | 440  | ligand_510 | 384  | ligand_505 | 487  | ligand_501 | 384  | ligand_510 |
|                  | 110  |            | 120  |            | 130  |            | 140  |            | 150  |            |
|                  | Rank | Ligand     | Rank | Ligand     | Rank | Ligand     | Rank | Ligand     | Rank | Ligand     |
|                  | 3    | ligand_507 | 1    | ligand_502 | 4    | ligand_506 | 4    | ligand_502 | 3    | ligand_502 |
|                  | 6    | ligand_506 | 22   | ligand_506 | 26   | ligand_505 | 35   | ligand_506 | 54   | ligand_506 |
|                  | 38   | ligand_503 | 78   | ligand_505 | 50   | ligand_502 | 95   | ligand_504 | 87   | ligand_504 |
|                  | 67   | ligand_502 | 90   | ligand_507 | 201  | ligand_501 | 132  | ligand_501 | 97   | ligand_509 |
|                  | 69   | ligand_501 | 143  | ligand_508 | 228  | ligand_504 | 171  | ligand_503 | 102  | ligand_507 |
|                  | 86   | ligand_504 | 251  | ligand_501 | 236  | ligand_510 | 179  | ligand_505 | 274  | ligand_503 |
|                  | 254  | ligand_505 | 268  | ligand_504 | 267  | ligand_507 | 247  | ligand_510 | 326  | ligand_501 |
|                  | 282  | ligand_508 | 297  | ligand_503 | 317  | ligand_509 | 362  | ligand_508 | 345  | ligand_505 |
|                  | 409  | ligand_510 | 324  | ligand_510 | 388  | ligand_503 | 400  | ligand_509 | 367  | ligand_508 |
|                  | 413  | ligand_509 | 332  | ligand_509 | 450  | ligand_508 | 447  | ligand_507 | 494  | ligand_510 |

| 160  |            | 170  |            | 180  |            | 190  |            | 200  |            |
|------|------------|------|------------|------|------------|------|------------|------|------------|
| Rank | Ligand     | Rank | Ligand     | Rank | Ligand     | Rank | Ligand     | Rank | Ligand     |
| 1    | ligand_502 | 4    | ligand_502 | 13   | ligand_506 | 17   | ligand_502 | 2    | ligand_506 |
| 5    | ligand_506 | 18   | ligand_506 | 39   | ligand_503 | 29   | ligand_506 | 9    | ligand_507 |
| 76   | ligand_503 | 44   | ligand_509 | 51   | ligand_502 | 78   | ligand_501 | 38   | ligand_503 |
| 90   | ligand_505 | 88   | ligand_507 | 89   | ligand_504 | 87   | ligand_504 | 62   | ligand_502 |
| 91   | ligand_507 | 158  | ligand_510 | 97   | ligand_510 | 143  | ligand_503 | 68   | ligand_501 |
| 113  | ligand_508 | 162  | ligand_503 | 303  | ligand_508 | 202  | ligand_509 | 121  | ligand_504 |
| 115  | ligand_509 | 199  | ligand_508 | 313  | ligand_505 | 246  | ligand_508 | 170  | ligand_505 |
| 162  | ligand_504 | 260  | ligand_504 | 404  | ligand_507 | 259  | ligand_505 | 246  | ligand_508 |
| 201  | ligand_501 | 407  | ligand_505 | 426  | ligand_509 | 288  | ligand_510 | 421  | ligand_509 |
| 402  | ligand_510 | 423  | ligand_501 | 476  | ligand_501 | 327  | ligand_507 | 481  | ligand_510 |

**Table S4.** Ligand ranking for apo-SrtA crystal structure

| MD<br>snapshot<br>(ns) | 0    |            | 5    |            | 10   |            | 20   |            | 25   |            |
|------------------------|------|------------|------|------------|------|------------|------|------------|------|------------|
|                        | Rank | Ligand     | Rank | Ligand     | Rank | ligand     | Rank | Ligand     | Rank | Ligand     |
|                        | 3    | ligand_502 | 1    | ligand_502 | 7    | ligand_502 | 2    | ligand_502 | 92   | ligand_503 |
|                        | 18   | ligand_506 | 13   | ligand_506 | 84   | ligand_507 | 16   | ligand_506 | 128  | ligand_506 |
|                        | 65   | ligand_503 | 17   | ligand_504 | 139  | ligand_509 | 34   | ligand_504 | 180  | ligand_510 |
|                        | 135  | ligand_509 | 40   | ligand_508 | 156  | ligand_504 | 72   | ligand_507 | 198  | ligand_504 |
|                        | 182  | ligand_505 | 82   | ligand_507 | 160  | ligand_503 | 88   | ligand_503 | 324  | ligand_502 |
|                        | 204  | ligand_501 | 108  | ligand_510 | 164  | ligand_506 | 95   | ligand_501 | 360  | ligand_507 |
|                        | 209  | ligand_508 | 160  | ligand_505 | 255  | ligand_508 | 98   | ligand_508 | 377  | ligand_508 |
|                        | 289  | ligand_510 | 244  | ligand_509 | 323  | ligand_501 | 110  | ligand_505 | 424  | ligand_505 |
|                        | 296  | ligand_504 | 300  | ligand_501 | 363  | ligand_505 | 221  | ligand_509 | 452  | ligand_501 |
|                        | 478  | ligand_507 | 339  | ligand_503 | 496  | ligand_510 | 421  | ligand_510 | 463  | ligand_509 |
|                        | 30   |            | 40   |            | 70   |            | 90   |            | 100  |            |
|                        | Rank | Ligand     | Rank | Ligand     | Rank | ligand     | Rank | Ligand     | Rank | Ligand     |
|                        | 98   | ligand_504 | 26   | ligand_502 | 12   | ligand_502 | 23   | ligand_504 | 15   | ligand_502 |
|                        | 185  | ligand_502 | 49   | ligand_504 | 63   | ligand_503 | 81   | ligand_509 | 26   | ligand_507 |
|                        | 202  | ligand_507 | 109  | ligand_501 | 87   | ligand_508 | 84   | ligand_502 | 87   | ligand_504 |
|                        | 225  | ligand_509 | 222  | ligand_509 | 90   | ligand_510 | 167  | ligand_505 | 95   | ligand_506 |
|                        | 287  | ligand_503 | 284  | ligand_505 | 96   | ligand_506 | 233  | ligand_503 | 112  | ligand_501 |
|                        | 317  | ligand_510 | 311  | ligand_506 | 102  | ligand_504 | 262  | ligand_506 | 164  | ligand_510 |
|                        | 326  | ligand_506 | 320  | ligand_510 | 253  | ligand_509 | 328  | ligand_510 | 225  | ligand_505 |
|                        | 385  | ligand_508 | 349  | ligand_508 | 277  | ligand_507 | 385  | ligand_507 | 377  | ligand_508 |
|                        | 430  | ligand_505 | 385  | ligand_507 | 381  | ligand_505 | 466  | ligand_508 | 378  | ligand_503 |
|                        | 485  | ligand_501 | 389  | ligand_503 | 502  | ligand_501 | 503  | ligand_501 | 411  | ligand_509 |
|                        | 110  |            | 120  |            | 130  |            | 140  |            | 150  |            |
|                        | Rank | Ligand     | Rank | Ligand     | Rank | ligand     | Rank | Ligand     | Rank | Ligand     |
|                        | 13   | ligand_502 | 24   | ligand_502 | 28   | ligand_506 | 12   | ligand_504 | 2    | ligand_502 |
|                        | 15   | ligand_504 | 80   | ligand_503 | 96   | ligand_502 | 58   | ligand_502 | 35   | ligand_507 |
|                        | 91   | ligand_503 | 99   | ligand_506 | 109  | ligand_509 | 114  | ligand_507 | 42   | ligand_510 |
|                        | 141  | ligand_509 | 111  | ligand_510 | 173  | ligand_504 | 264  | ligand_503 | 68   | ligand_509 |
|                        | 196  | ligand_506 | 124  | ligand_509 | 248  | ligand_510 | 288  | ligand_509 | 91   | ligand_503 |
|                        | 250  | ligand_507 | 245  | ligand_508 | 295  | ligand_507 | 335  | ligand_506 | 199  | ligand_504 |
|                        | 475  | ligand_505 | 343  | ligand_505 | 297  | ligand_505 | 406  | ligand_508 | 211  | ligand_505 |
|                        | 488  | ligand_501 | 363  | ligand_507 | 413  | ligand_503 | 480  | ligand_510 | 277  | ligand_501 |
|                        | 491  | ligand_508 | 452  | ligand_501 | 416  | ligand_501 | 486  | ligand_501 | 302  | ligand_506 |
|                        | 493  | ligand_510 | 509  | ligand_504 | 505  | ligand_508 | 497  | ligand_505 | 358  | ligand_508 |

| 160  |            | 170  |            | 180  |            | 190  |            | 200  |            |
|------|------------|------|------------|------|------------|------|------------|------|------------|
| Rank | Ligand     | Rank | Ligand     | Rank | ligand     | Rank | Ligand     | Rank | Ligand     |
| 10   | ligand_506 | 22   | ligand_506 | 9    | ligand_502 | 98   | ligand_509 | 26   | ligand_506 |
| 12   | ligand_502 | 37   | ligand_503 | 18   | ligand_506 | 109  | ligand_504 | 60   | ligand_504 |
| 13   | ligand_503 | 54   | ligand_502 | 40   | ligand_504 | 141  | ligand_507 | 83   | ligand_502 |
| 27   | ligand_509 | 73   | ligand_504 | 59   | ligand_503 | 153  | ligand_502 | 129  | ligand_507 |
| 83   | ligand_507 | 215  | ligand_507 | 158  | ligand_509 | 244  | ligand_505 | 169  | ligand_509 |
| 109  | ligand_504 | 218  | ligand_501 | 278  | ligand_510 | 246  | ligand_503 | 207  | ligand_503 |
| 140  | ligand_510 | 243  | ligand_509 | 382  | ligand_508 | 259  | ligand_506 | 299  | ligand_505 |
| 262  | ligand_505 | 391  | ligand_508 | 446  | ligand_505 | 290  | ligand_510 | 432  | ligand_510 |
| 300  | ligand_501 | 431  | ligand_505 | 453  | ligand_501 | 344  | ligand_501 | 496  | ligand_508 |
| 449  | ligand_508 | 479  | ligand_510 | 487  | ligand_507 | 465  | ligand_508 | 509  | ligand_501 |

**Table S5.** Ligand ranking for holo-SrtA NMR structure

| MD snapshot (ns) | 0    |            | 5    |            | 10   |            | 30   |            | 40   |            |
|------------------|------|------------|------|------------|------|------------|------|------------|------|------------|
|                  | Rank | Ligand     | Rank | Ligand     | Rank | Ligand     | Rank | Ligand     | Rank | ligand     |
|                  | 11   | ligand_506 | 8    | ligand_502 | 6    | ligand_502 | 28   | ligand_502 | 4    | ligand_502 |
|                  | 16   | ligand_502 | 71   | ligand_506 | 25   | ligand_504 | 78   | ligand_506 | 21   | ligand_505 |
|                  | 47   | ligand_504 | 149  | ligand_503 | 46   | ligand_506 | 144  | ligand_509 | 32   | ligand_509 |
|                  | 211  | ligand_509 | 151  | ligand_507 | 68   | ligand_509 | 160  | ligand_504 | 142  | ligand_504 |
|                  | 233  | ligand_507 | 182  | ligand_509 | 161  | ligand_510 | 345  | ligand_505 | 170  | ligand_507 |
|                  | 240  | ligand_505 | 205  | ligand_501 | 200  | ligand_501 | 369  | ligand_510 | 204  | ligand_501 |
|                  | 244  | ligand_510 | 231  | ligand_505 | 241  | ligand_503 | 413  | ligand_507 | 214  | ligand_510 |
|                  | 284  | ligand_501 | 240  | ligand_504 | 376  | ligand_507 | 453  | ligand_508 | 274  | ligand_503 |
|                  | 337  | ligand_508 | 274  | ligand_508 | 413  | ligand_508 | 479  | ligand_503 | 334  | ligand_506 |
|                  | 365  | ligand_503 | 484  | ligand_510 | 489  | ligand_505 | 489  | ligand_501 | 374  | ligand_508 |
|                  | 50   |            | 60   |            | 70   |            | 90   |            | 100  |            |
|                  | Rank | Ligand     | Rank | Ligand     | Rank | Ligand     | Rank | Ligand     | Rank | ligand     |
|                  | 2    | ligand_502 | 4    | ligand_502 | 4    | ligand_502 | 8    | ligand_502 | 4    | ligand_506 |
|                  | 55   | ligand_508 | 12   | ligand_506 | 21   | ligand_504 | 17   | ligand_506 | 58   | ligand_502 |
|                  | 86   | ligand_509 | 19   | ligand_503 | 76   | ligand_505 | 109  | ligand_505 | 117  | ligand_504 |
|                  | 92   | ligand_503 | 130  | ligand_505 | 88   | ligand_509 | 128  | ligand_503 | 128  | ligand_508 |
|                  | 95   | ligand_501 | 143  | ligand_508 | 138  | ligand_503 | 165  | ligand_508 | 150  | ligand_503 |
|                  | 100  | ligand_505 | 200  | ligand_504 | 172  | ligand_508 | 214  | ligand_510 | 210  | ligand_510 |
|                  | 135  | ligand_504 | 216  | ligand_509 | 268  | ligand_507 | 251  | ligand_504 | 220  | ligand_509 |
|                  | 164  | ligand_506 | 295  | ligand_501 | 440  | ligand_506 | 293  | ligand_507 | 304  | ligand_505 |
|                  | 181  | ligand_510 | 395  | ligand_510 | 467  | ligand_510 | 332  | ligand_501 | 342  | ligand_507 |
|                  | 436  | ligand_507 | 409  | ligand_507 | 505  | ligand_501 | 379  | ligand_509 | 411  | ligand_501 |
|                  | 110  |            | 120  |            | 130  |            | 140  |            | 150  |            |
|                  | Rank | Ligand     | Rank | Ligand     | Rank | Ligand     | Rank | Ligand     | Rank | ligand     |
|                  | 7    | ligand_502 | 3    | ligand_502 | 6    | ligand_502 | 1    | ligand_506 | 4    | ligand_502 |
|                  | 14   | ligand_504 | 12   | ligand_506 | 8    | ligand_506 | 2    | ligand_502 | 8    | ligand_506 |
|                  | 45   | ligand_506 | 53   | ligand_504 | 69   | ligand_505 | 107  | ligand_510 | 80   | ligand_504 |
|                  | 60   | ligand_509 | 65   | ligand_509 | 158  | ligand_510 | 123  | ligand_509 | 131  | ligand_505 |
|                  | 158  | ligand_508 | 71   | ligand_508 | 185  | ligand_508 | 132  | ligand_507 | 143  | ligand_509 |
|                  | 194  | ligand_510 | 84   | ligand_510 | 223  | ligand_509 | 183  | ligand_505 | 173  | ligand_503 |
|                  | 239  | ligand_507 | 148  | ligand_505 | 241  | ligand_504 | 288  | ligand_504 | 190  | ligand_507 |
|                  | 282  | ligand_505 | 150  | ligand_501 | 249  | ligand_501 | 294  | ligand_503 | 228  | ligand_510 |
|                  | 341  | ligand_503 | 162  | ligand_507 | 278  | ligand_507 | 335  | ligand_508 | 281  | ligand_508 |
|                  | 456  | ligand_501 | 396  | ligand_503 | 332  | ligand_503 | 391  | ligand_501 | 335  | ligand_501 |



| 160  |            | 170  |            | 180  |            | 190  |            | 200  |            |
|------|------------|------|------------|------|------------|------|------------|------|------------|
| Rank | Ligand     | Rank | Ligand     | Rank | Ligand     | Rank | Ligand     | Rank | ligand     |
| 13   | ligand_506 | 5    | ligand_502 | 1    | ligand_502 | 18   | ligand_506 | 17   | ligand_502 |
| 15   | ligand_502 | 24   | ligand_504 | 21   | ligand_506 | 29   | ligand_502 | 87   | ligand_507 |
| 68   | ligand_503 | 59   | ligand_509 | 124  | ligand_509 | 80   | ligand_510 | 98   | ligand_505 |
| 75   | ligand_508 | 138  | ligand_507 | 138  | ligand_505 | 163  | ligand_508 | 132  | ligand_510 |
| 98   | ligand_509 | 153  | ligand_506 | 221  | ligand_503 | 207  | ligand_507 | 142  | ligand_509 |
| 104  | ligand_505 | 184  | ligand_508 | 229  | ligand_510 | 219  | ligand_509 | 159  | ligand_504 |
| 207  | ligand_504 | 229  | ligand_505 | 232  | ligand_508 | 264  | ligand_504 | 205  | ligand_506 |
| 218  | ligand_507 | 330  | ligand_503 | 313  | ligand_507 | 308  | ligand_505 | 411  | ligand_508 |
| 368  | ligand_501 | 409  | ligand_510 | 342  | ligand_504 | 312  | ligand_503 | 469  | ligand_503 |
| 400  | ligand_510 | 449  | ligand_501 | 414  | ligand_501 | 350  | ligand_501 | 505  | ligand_501 |

**Table S6.** Performance metrics based on Boltzmann weighted averaged docking scores.

| Ensemble          | EF1% | BEDROC             |                   | AUC  | RIE  |
|-------------------|------|--------------------|-------------------|------|------|
|                   |      | ( $\alpha=160.9$ ) | ( $\alpha=20.0$ ) |      |      |
| apo-SrtA NMR      | 0    | 0.206              | 0.164             | 0.52 | 2.71 |
| holo-SrtA NMR     | 10   | 0.283              | 0.178             | 0.64 | 2.94 |
| apo-SrtA crystal  | 10   | 0.110              | 0.151             | 0.66 | 2.50 |
| holo-SrtA crystal | 0    | 0.01               | 0.136             | 0.61 | 2.25 |

**Table S7.** EF<sup>1%</sup>, BEDROC ( $\alpha=160.9$ ), BEDROC ( $\alpha=20$ ), AUC, RIE values for snapshots of the SMD simulations.

| SMD snapshot | EF <sup>1%</sup> | BEDROC( $\alpha=160.9$ ) | BEDROC( $\alpha=20.0$ ) | AUC   | RIE   |
|--------------|------------------|--------------------------|-------------------------|-------|-------|
| 1 ns         | 10               | 0.284                    | 0.206                   | 0.7   | 3.41  |
| 2ns          | 10               | 0.283                    | 0.174                   | 0.69  | 2.88  |
| 3ns          | 0                | 0.043                    | 0.144                   | 0.6   | 2.38  |
| 4ns          | 20               | 0.392                    | 0.0241                  | 0.68  | 3.99  |
| 5ns          | 10               | 0.15                     | 0.122                   | 0.65  | 2.01  |
| 6ns          | 20               | 0.494                    | 0.388                   | 0.68  | 6.41  |
| 7ns          | 10               | 0.211                    | 0.209                   | 0.76  | 3.46  |
| 8ns          | 10               | 0.291                    | 0.199                   | 0.52  | 3.3   |
| 9ns          | 10               | 0.286                    | 0.202                   | 0.69  | 3.34  |
| 10ns         | 10               | 0.15                     | 0.154                   | 0.64  | 2.55  |
| 11ns         | 10               | 0.212                    | 0.263                   | 0.71  | 4.35  |
| 12ns         | 10               | 0.151                    | 0.217                   | 0.67  | 3.58  |
| 13ns         | 10               | 0.217                    | 0.273                   | 0.71  | 4.52  |
| 14ns         | 10               | 0.207                    | 0.283                   | 0.78  | 4.69  |
| 15ns         | 10               | 0.151                    | 0.164                   | 0.62  | 2.71  |
| 15.5ns       | 20               | 0.464                    | 0.322                   | 0.56  | 5.33  |
| 16ns         | 10               | 0.11                     | 0.161                   | 0.65  | 2.66  |
| 16.5ns       | 20               | 0.23                     | 0.263                   | 0.68  | 4.35  |
| 17ns         | 20               | 0.393                    | 0.308                   | 0.72  | 5.09  |
| 17.5ns       | 10               | 0.206                    | 0.139                   | 0.61  | 2.3   |
| average      | 12               | 0.2463                   | 0.2108                  | 0.666 | 3.737 |
